# Supplementary material
Source: Springer Nature journal article supplement (https://www.springermedizin.de/resource/supplementary/12967_2010_747_MOESM3_ESM.pdf/9577426)

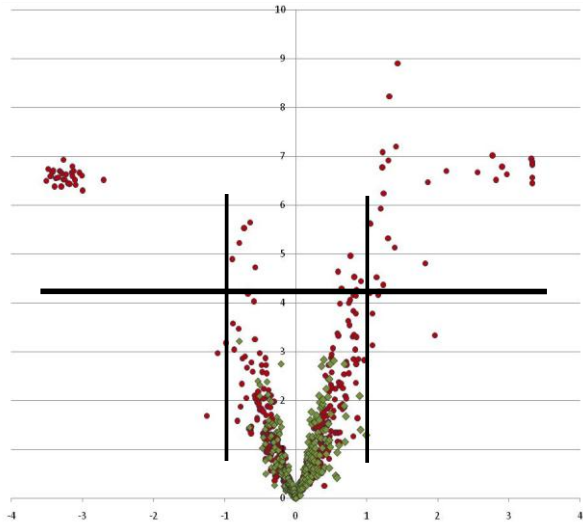

Supplement: MOESM3 [file 9577426]
